# Supplementary material
Source: publisher figshare collection journal article supplement (https://acs.figshare.com/ndownloader/files/4039030)
Supplement: Supplementary file 1 [file 4039030]

## SUPPLEMENTARY INFORMATION

A typical Rietveld refinement of single-phase mayenite is shown in Figure 1. Experimental parameters and final residual values are listed in Table 1. The inset of Figure 1 shows the angular region, in which the most intense peaks of CA and C3A are found to illustrate the phase purity. For comparison, the XRD of a sample containing traces of both impurities is also shown. The small step visible at 32.2 °2 $\theta$  results from the absorption edge of the applied Ni-filter.

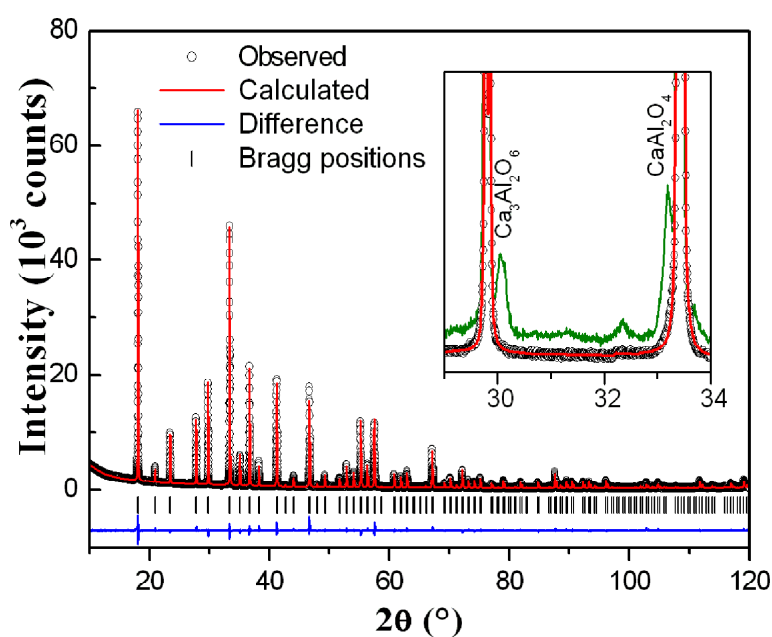

Figure 1: Rietveld refinement plot of  $\text{Ca}_{12}\text{Al}_{14}\text{O}_{33}$ . The inset shows the region in which the main peaks of CA and C3A occur. For comparison the XRD of a sample containing small amounts of CA and C3A is additionally shown.

Table 1: Experimental parameters and residual parameters for the Rietveld refinement shown in Figure 1.

|                          |                                                         |
|--------------------------|---------------------------------------------------------|
| Diffractometer           | Bruker D8 Advance (Bragg-Brentano theta-theta geometry) |
| Radiation                | Cu-K $_{\alpha 1,2}$ (1.5406 Å+1.5444 Å)                |
| Detector                 | LynX Eye (linear silicon strip detector)                |
| Angular range            | $10 \leq 2\theta \leq 120$ °2 $\theta$                  |
| Step width               | 0.005244 °2 $\theta$                                    |
| Counting time/data point | 2.5 seconds                                             |
| R <sub>p</sub>           | 3.94                                                    |
| R <sub>wp</sub>          | 5.48                                                    |
| R <sub>Bragg</sub>       | 3.36                                                    |
| $\chi^2$                 | 2.99                                                    |
